# Supplementary material for: Design, synthesis and evaluation of liver-targeting fluorescent probes for detecting mercury ions
Source: Royal Society of Chemistry journal article supplement (doi:10.1039/d2dt01393b), 2022-01-01
Supplement: d2dt01393b1.pdf [file d2dt01393b1.pdf]

## Supplemental Information

### Design, synthesis and evaluation of liver-targeting fluorescent probe for detecting mercury ion

Wei Hu <sup>a</sup>, Jianyi Wang<sup>\*b</sup>

<sup>a</sup> State Key Laboratory for Conservation and Utilization of Subtropical Agro-Bioresources, Guangxi University, Nanning 530004, China

<sup>b</sup> Medical College, Guangxi University, Nanning 530004, China

\* Corresponding author: jianyi Wang, email: [jianyiwang@gxu.edu.cn](mailto:jianyiwang@gxu.edu.cn)

#### Figures and captions

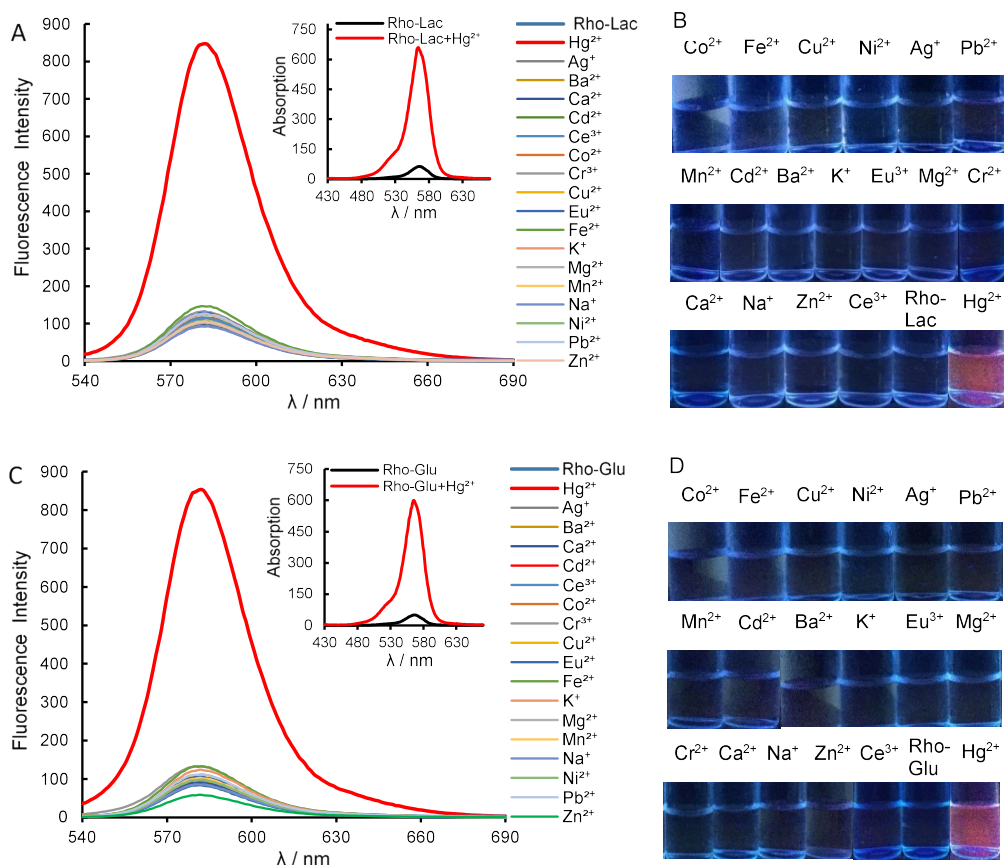

**Fig.S1** Fluorescence response of probes toward different metal ions. The Hg<sup>2+</sup> aqueous solution of 50  $\mu\text{M}$  was added into the probes solution of 5  $\mu\text{M}$  (10 mM stock solution dissolved in DMSO, then diluted using water). Fluorescence determination of Rho-Lac (A) and Rho-Glu (C) via fluorescence spectrophotometer. Fluorescence response of Rho-Lac (B) and Rho-Glu (D) using Ultra-Violet irradiation.

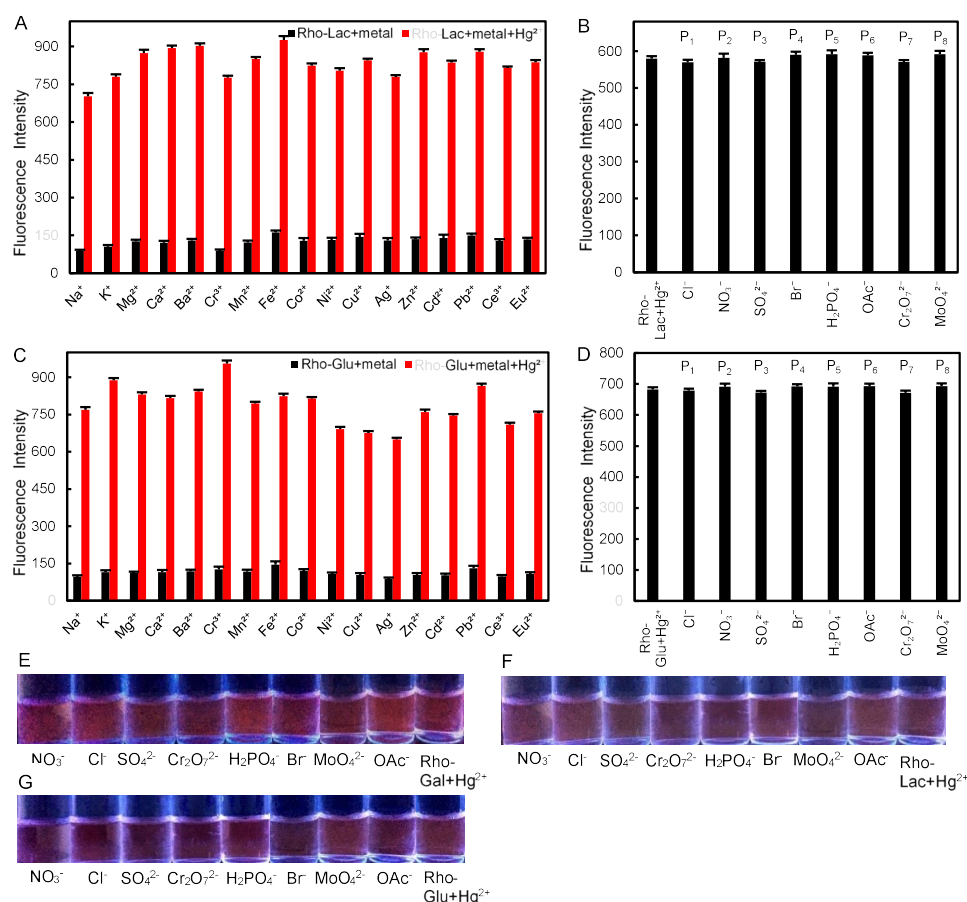

**Fig. S2** Fluorescent signal alterations of probes to  $Hg^{2+}$  with other ions. Metal ions competition of Rho-Lac (A) and Rho-Glu (C). Data was analyzed using a two-way RMANOVA test (different metal ions  $\times$  addition of  $Hg^{2+}$  interaction). Rho-Lac,  $F(1, 136) = 249099.5$  and  $P < 0.0001$ , for whether to add  $Hg^{2+}$ ; Rho-Glu,  $F(1, 136) = 277322$  and  $P < 0.0001$ , for whether to add  $Hg^{2+}$ . Anions interference of Rho-Lac (B) and Rho-Glu (D). Data was analyzed using a one-way ANOVA test.  $P > 0.05$ , compared with Rho-Lac+ $Hg^{2+}$  ( $P_1=0.061252$ ,  $P_2=0.673622$ ,  $P_3=0.062108$ ,  $P_4=0.062898$ ,  $P_5=0.058265$ ,  $P_6=0.05968$ ,  $P_7=0.057582$ ,  $P_8=0.050567$ );  $P > 0.05$ , compared with Rho-Glu+ $Hg^{2+}$  ( $P_1=0.49376$ ,  $P_2=0.173098$ ,  $P_3=0.052019$ ,  $P_4=0.05616$ ,  $P_5=0.190145$ ,  $P_6=0.065849$ ,  $P_7=0.052146$ ,  $P_8=0.09182$ ). Anions interference for Rho-Gal (E), Rho-Lac (F) and Rho-Glu (G) using Ultra-Violet irradiation.

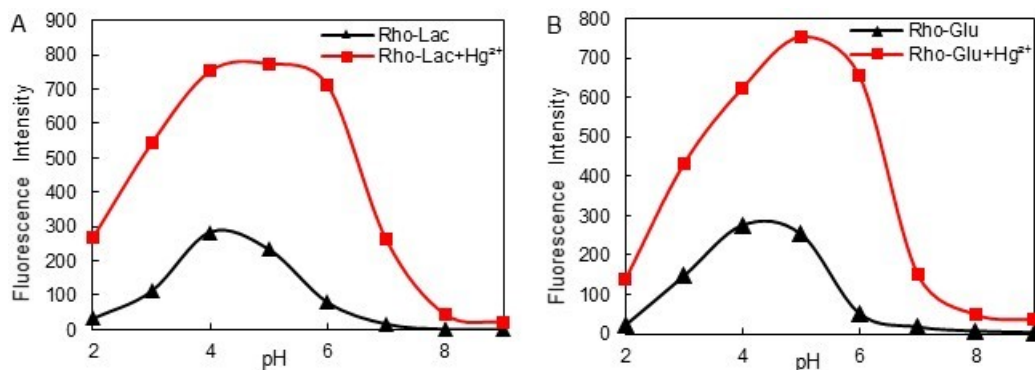

**Fig. S3** Fluorescence alterations of Rho-Lac (A) and Rho-Glu (B) in different pH. The 5  $\mu M$  probes solution and 10  $\mu M$   $Hg^{2+}$  solution were prepared with different pH value using HAC-NaOAc buffer at pH value of 2, 3, 4, 5, 6, 7, 8, and 9 respectively.

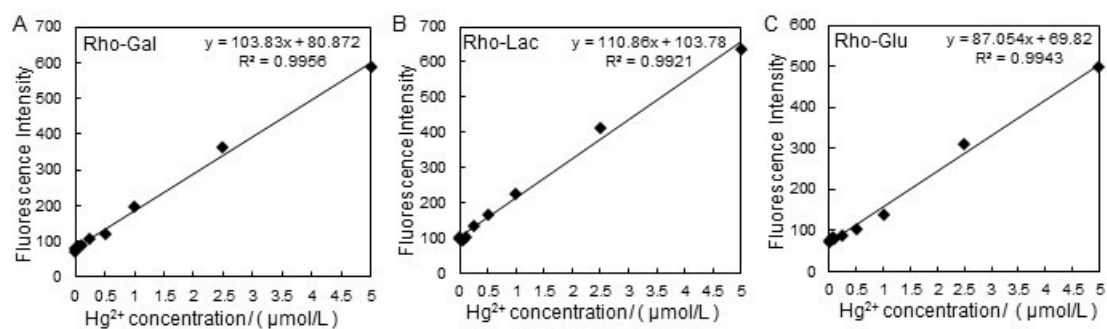

**Fig. S4** Linearity between  $\text{Hg}^{2+}$  concentration and fluorescence intensity. The 5  $\mu\text{M}$  Rho-Gal(A), Rho-Lac (B) and Rho-Glu (C) probes solution were added with  $\text{Hg}^{2+}$  solution of 0.01, 0.05, 0.1, 0.25, 0.5, 1.0, 2.5, 5  $\mu\text{M}$  respectively to detect the fluorescence response value.

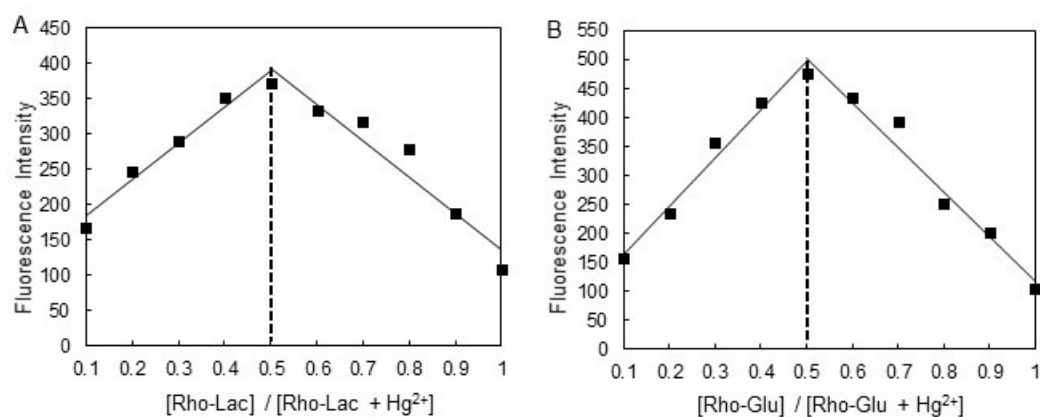

**Fig. S5** Job's plot of Rho-Lac (A) and Rho-Glu (B) probes- $\text{Hg}^{2+}$ . The  $\text{Hg}^{2+}$ , probes solution (10 mM stock solution in DMSO) were prepared and diluted using water to keep the total concentration of probes and  $\text{Hg}^{2+}$  solution at 10  $\mu\text{M}$ .

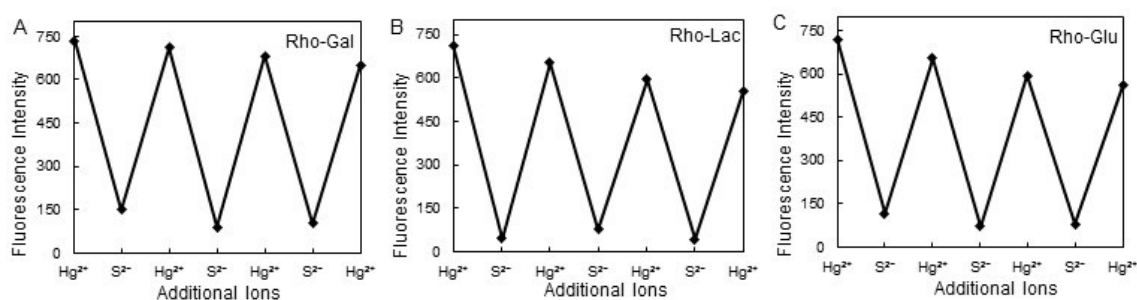

**Fig. S6** Fluorescent cycle changes of Rho-Gal (A), Rho-Lac (B) and Rho-Glu (C) to  $\text{Hg}^{2+}$  with addition of  $\text{S}^{2-}$ . The probes stock solution of 10 mM were prepared with DMSO, then diluted to 5  $\mu\text{M}$  using water. The  $\text{Hg}^{2+}$  and  $\text{S}^{2-}$  solution of 50  $\mu\text{M}$  also was dissolved in water.

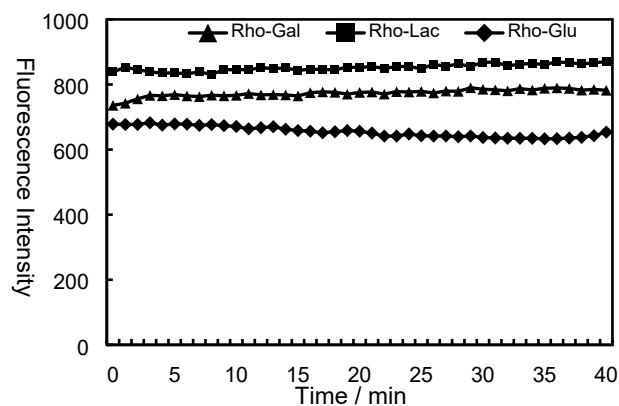

**Fig. S7** Fluorescence stability of probes toward  $\text{Hg}^{2+}$ .  $\text{Hg}^{2+}$  solution with 50  $\mu\text{M}$  was added into the 5  $\mu\text{M}$  probes solution, and the fluorescence response was continuously detected at 1 min interval within 40 min.

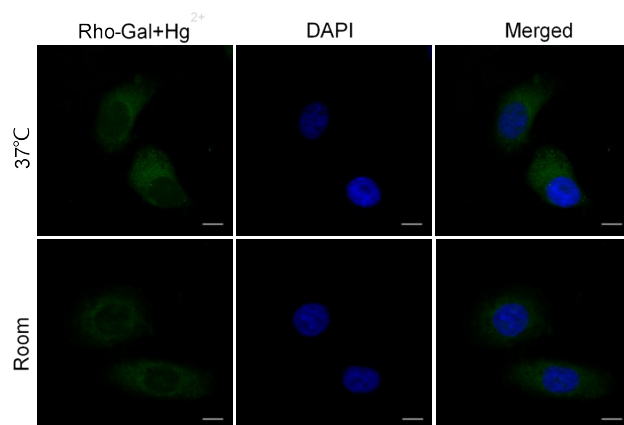

**Fig. S8** Fluorescence response of Rho-Gal to  $\text{Hg}^{2+}$  in dead cells (scale bar 10  $\mu\text{m}$ ). Two copies of HepG2 cells fixed for 15 min were prepared. One was treated with 20  $\mu\text{M}$  Rho-Gal solution at room temperature for 20 min, and incubated with 200  $\mu\text{M}$   $\text{Hg}^{2+}$  solution at room temperature for 15 min, then stained with DAPI for 5 min. Another was incubated with 20  $\mu\text{M}$  Rho-Gal solution at 37 ° C for 20 min, incubated with 200  $\mu\text{M}$   $\text{Hg}^{2+}$  solution at 37 ° C for 15 min, and stained with DAPI for 5 min. Then the cellular fluorescence imaging was acquired.

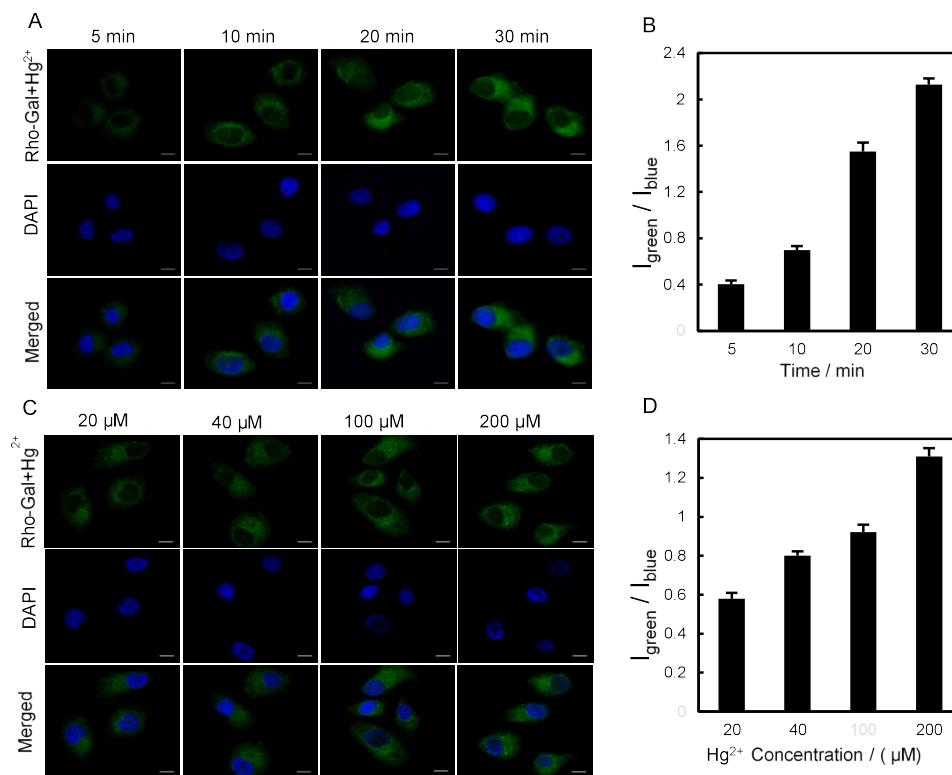

**Fig. S9** Intracellular fluorescence manners of Rho-Gal to  $\text{Hg}^{2+}$ . The scale bar is 10  $\mu\text{m}$ .  $I_{\text{green}}$  and  $I_{\text{blue}}$  is the fluorescence intensity of Rho-Gal+ $\text{Hg}^{2+}$  and DAPI respectively. Cellular fluorescence imaging in quintuplicate was acquired and data was analyzed using a one-way ANOVA,  $P < 0.0001$ . (A) (B) Rho-Gal incubated with HepG2 cells for different time. HepG2 cells were incubated in incubator with 20  $\mu\text{M}$  Rho-Gal solution dissolved in DMEM for 5, 10, 20 and 30 min, respectively, then incubated with 200  $\mu\text{M}$   $\text{Hg}^{2+}$  solution dissolved in DMEM for 15 min, fixed for 15 min, and treated with DAPI for 5 min. Cellular fluorescence imaging in quintuplicate was acquired. (C) (D) Rho-Gal reacted with different concentration of  $\text{Hg}^{2+}$  in HepG2 cells. HepG2 cells were incubated with 20  $\mu\text{M}$  Rho-Gal dissolved in DMEM in incubator for 15 min, then incubated with  $\text{Hg}^{2+}$  solution dissolved in DMEM with different concentration of 20, 40, 100 and 200  $\mu\text{M}$  in incubator for 15 min, fixed for 15 min and treated with DAPI for 5 min.

## Characterization of compounds

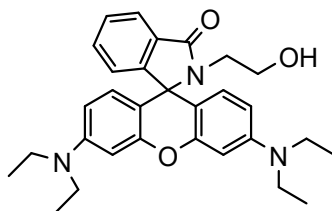

The compound was gray white solid, yield 35%.  $^1\text{H}$  NMR (600 MHz,  $\text{CDCl}_3$ )  $\delta$  7.92 (dd,  $J = 5.6, 3.0$  Hz, 1H), 7.46 (dd,  $J = 5.6, 3.1$  Hz, 2H), 7.09 (dd,  $J = 5.2, 3.2$  Hz, 1H), 6.51 (d,  $J = 8.9$  Hz, 2H), 6.40 (d,  $J = 2.4$  Hz, 2H), 6.31 (dd,  $J = 8.9, 2.4$  Hz, 2H), 3.51 – 3.47 (m, 2H), 3.36 (q,  $J = 7.0$  Hz, 8H), 3.32 – 3.29 (m, 2H), 1.19 (t,  $J = 7.1$  Hz, 12H).  $^{13}\text{C}$  NMR (151 MHz,  $\text{CDCl}_3$ )  $\delta$  170.10, 153.92, 153.28, 148.90, 132.69,

130.45, 128.51, 128.14, 123.81, 122.90, 108.24, 104.80, 97.80, 65.87, 62.68, 62.66, 44.65, 44.37, 12.61.

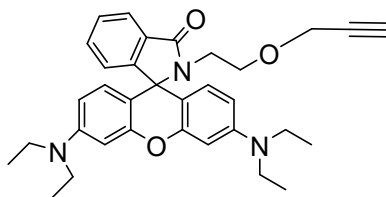

The compound was grey white solid, yield 86%.  $^1\text{H}$  NMR (600 MHz,  $\text{CDCl}_3$ )  $\delta$  7.94 – 7.90 (m, 1H), 7.46 – 7.43 (m, 2H), 7.12 – 7.07 (m, 1H), 6.46 (d,  $J = 8.9$  Hz, 2H), 6.40 (d,  $J = 2.6$  Hz, 2H), 6.29 (dd,  $J = 8.9, 2.6$  Hz, 2H), 3.91 (d,  $J = 2.4$  Hz, 2H), 3.37 (dq,  $J = 14.2, 7.1$  Hz, 10H), 3.24 (t,  $J = 7.0$  Hz, 2H), 2.30 (t,  $J = 2.4$  Hz, 1H), 1.18 (t,  $J = 7.1$  Hz, 12H).

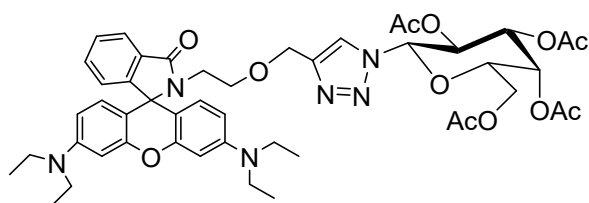

The compound was light red solid, yield 88%.  $^1\text{H}$  NMR (600 MHz,  $\text{CDCl}_3$ )  $\delta$  7.90 – 7.86 (m, 1H), 7.77 (s, 1H), 7.42 – 7.38 (m, 2H), 7.07 – 7.03 (m, 1H), 6.42 (dd,  $J = 8.9, 4.9$  Hz, 2H), 6.36 (d,  $J = 2.4$  Hz, 2H), 6.29 – 6.22 (m, 2H), 5.78 (d,  $J = 9.3$  Hz, 1H), 5.56 – 5.50 (m, 2H), 5.21 (dd,  $J = 10.3, 3.3$  Hz, 1H), 4.40 – 4.35 (m, 2H), 4.20 – 4.17 (m, 1H), 4.12 – 4.07 (m, 2H), 3.38 (t,  $J = 7.2$  Hz, 2H), 3.31 (q,  $J = 7.0$  Hz, 8H), 3.18 (dt,  $J = 9.4, 7.1$  Hz, 2H), 2.21 (s, 3H), 2.01 (s, 3H), 1.98 (s, 3H), 1.83 (s, 3H), 1.14 (t,  $J = 7.0$  Hz, 12H).

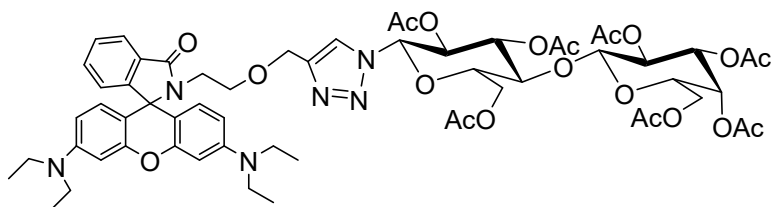

The compound was light red solid, yield 84%.  $^1\text{H}$  NMR (600 MHz,  $\text{CDCl}_3$ )  $\delta$  7.93 – 7.90 (m, 1H), 7.71 (s, 1H), 7.46 – 7.42 (m, 2H), 7.11 – 7.07 (m, 1H), 6.45 (dd,  $J = 8.8, 7.0$  Hz, 2H), 6.39 (d,  $J = 1.7$  Hz, 2H), 6.27 (dd,  $J = 8.9, 2.4$  Hz, 2H), 5.78 (d,  $J = 8.8$  Hz, 1H), 5.41 (ddd,  $J = 10.6, 9.4, 6.3$  Hz, 3H), 5.15 (dd,  $J = 10.4, 7.9$  Hz, 1H), 4.99 (dd,  $J = 10.4, 3.5$  Hz, 1H), 4.54 (d,  $J = 7.9$  Hz, 1H), 4.47 (dd,  $J = 12.1, 1.7$  Hz, 1H), 4.38 (s, 2H), 4.14 (qd,  $J = 11.2, 6.6$  Hz, 3H), 3.99 – 3.95 (m, 1H), 3.94 – 3.88 (m, 2H), 3.41 (t,  $J = 7.2$  Hz, 2H), 3.35 (q,  $J = 7.0$  Hz, 8H), 3.22 – 3.18 (m, 2H), 2.18 (s, 3H), 2.11 (s, 3H), 2.10 (s, 3H), 2.07 (s, 6H), 1.99 (s, 3H), 1.84 (s, 3H), 1.18 (td,  $J = 6.9, 1.0$  Hz, 12H).

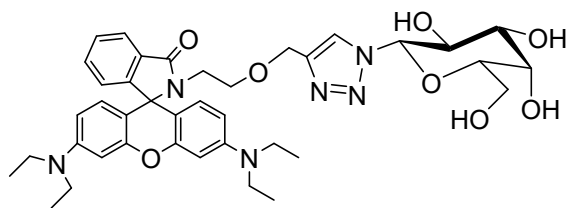

**Rho-Gal**, light red solid, yield 92%.  $^1\text{H}$  NMR (600 MHz,  $\text{CDCl}_3$ )  $\delta$  8.00 (s, 1H), 7.81 (d,  $J = 6.7$  Hz, 1H), 7.38 – 7.32 (m, 2H), 7.00 (d,  $J = 6.6$  Hz, 1H), 6.39 – 6.34 (m, 4H), 6.26 – 6.21 (m, 2H), 5.57 (d,  $J = 9.0$  Hz, 1H), 4.33 (t,  $J = 9.1$  Hz, 1H), 4.26 (s, 2H), 4.18 (s, 1H), 3.87 – 3.77 (m, 4H), 3.28 (dd,  $J = 13.7, 6.6$  Hz, 10H), 3.07 (t,  $J = 6.2$  Hz, 2H), 1.11 (t,  $J = 7.0$  Hz, 12H).  $^{13}\text{C}$  NMR (151 MHz,  $\text{CD}_3\text{OD}$ )  $\delta$  168.85, 153.74, 153.35, 149.01, 144.74, 132.72, 130.54, 128.30, 128.09, 123.66, 122.26, 122.18, 108.21, 104.76, 97.66, 88.86, 78.54, 73.91, 70.05, 68.96, 66.90, 65.52, 63.26, 61.01, 43.99, 39.00, 11.51. HRMS:  $[\text{M}+\text{H}]^+$  calculated for  $\text{C}_{39}\text{H}_{49}\text{N}_6\text{O}_8$ ,  $m/z$  729.36064, measured  $m/z$  729.36157. mp 165.3-167.9.

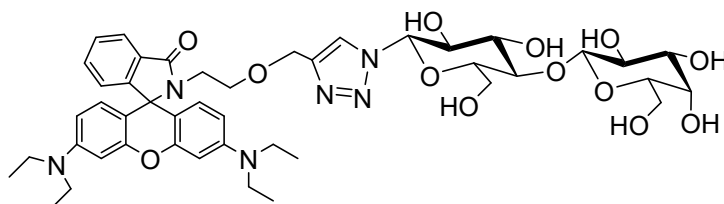

**Rho-Lac**, light red solid, yield 91%.  $^1\text{H}$  NMR (600 MHz,  $\text{CD}_3\text{OD}$ )  $\delta$  8.05 (s, 1H), 7.88 – 7.84 (m, 1H), 7.52 – 7.48 (m, 2H), 7.03 – 7.00 (m, 1H), 6.43 (s, 2H), 6.34 (d,  $J = 0.9$  Hz, 4H), 5.61 (d,  $J = 9.2$  Hz, 1H), 4.43 (d,  $J = 7.7$  Hz, 1H), 4.29 (s, 2H), 3.95 (t,  $J = 9.1$  Hz, 1H), 3.89 (d,  $J = 2.9$  Hz, 2H), 3.84 (d,  $J = 3.2$  Hz, 1H), 3.80 (td,  $J = 11.1, 8.6$  Hz, 2H), 3.73 (ddd,  $J = 12.8, 9.1, 3.1$  Hz, 3H), 3.63 (dd,  $J = 7.5, 4.7$  Hz, 1H), 3.59 (dd,  $J = 9.6, 7.8$  Hz, 1H), 3.52 (dd,  $J = 9.7, 3.3$  Hz, 1H), 3.36 (q,  $J = 7.0$  Hz, 8H), 3.12 (t,  $J = 6.6$  Hz, 2H), 1.14 (t,  $J = 7.0$  Hz, 12H).  $^{13}\text{C}$  NMR (151 MHz,  $\text{CD}_3\text{OD}$ )  $\delta$  168.86, 153.74, 153.35, 149.02, 144.69, 132.73, 130.53, 128.29, 128.11, 123.66, 122.63, 122.18, 108.21, 104.74, 103.71, 97.65, 87.94, 78.26, 78.15, 75.75, 75.41, 73.43, 72.28, 71.16, 68.93, 66.93, 65.53, 63.25, 61.15, 60.14, 43.99, 38.99, 11.51. HRMS:  $[\text{M}+\text{H}]^+$  calculated for  $\text{C}_{45}\text{H}_{59}\text{N}_6\text{O}_{13}$ ,  $m/z$  891.41346, measured  $m/z$  891.41516. mp 176.5-179.6.

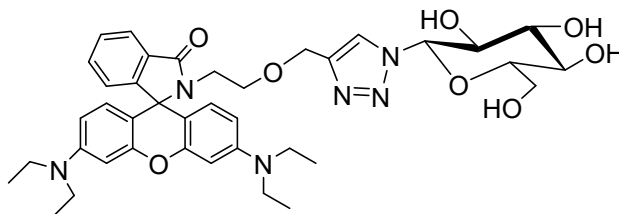

**Rho-Glu**, light red solid, yield 83%.  $^1\text{H}$  NMR (600 MHz,  $\text{CD}_3\text{OD}$ )  $\delta$  8.06 (s, 1H), 7.87 (dt,  $J = 5.9, 2.5$  Hz, 1H), 7.54 – 7.49 (m, 2H), 7.04 – 7.02 (m, 1H), 6.45 (s, 2H), 6.39 – 6.34 (m, 4H), 5.59 (d,  $J = 9.2$  Hz, 1H), 4.30 (s, 2H), 3.92 – 3.87 (m, 2H), 3.72 (dd,  $J = 12.2, 5.3$  Hz, 1H), 3.61 – 3.55 (m, 2H), 3.55 – 3.50 (m, 1H), 3.38 (q,  $J = 7.0$  Hz, 8H), 3.34 – 3.32 (m, 2H), 3.13 (t,  $J = 6.6$  Hz, 2H), 1.16 (t,  $J = 7.0$  Hz, 12H).  $^{13}\text{C}$

NMR (151 MHz, CD<sub>3</sub>OD)  $\delta$  168.85, 153.74, 153.35, 149.02, 144.65, 132.73, 130.54, 128.29, 128.10, 123.66, 122.64, 122.17, 108.21, 104.75, 97.65, 88.21, 79.73, 77.06, 72.65, 69.49, 66.92, 65.52, 63.25, 61.01, 43.99, 38.98, 11.51. HRMS: [M+H]<sup>+</sup> calculated for C<sub>39</sub>H<sub>49</sub>N<sub>6</sub>O<sub>8</sub>, m/z 729.36064, measured m/z 729.36194. mp 164.6-167.5.

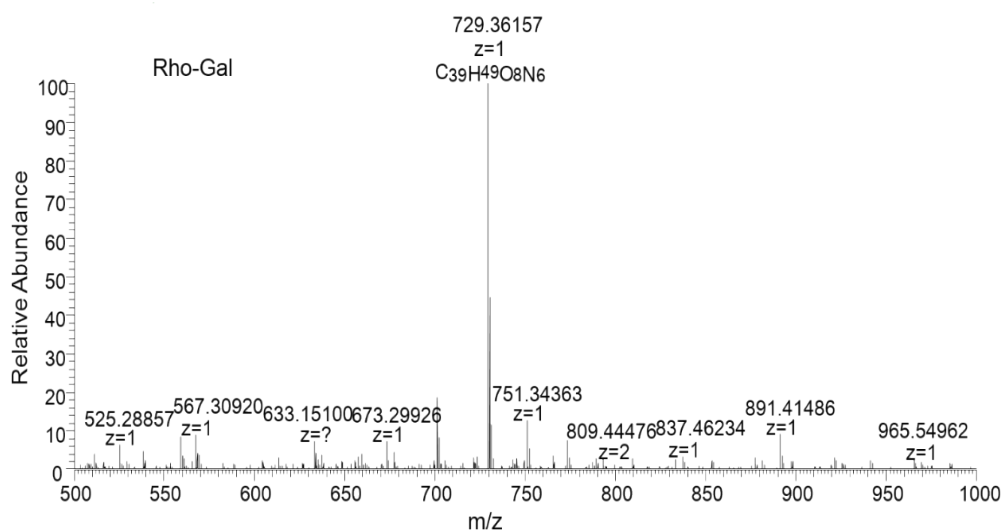

**Fig. S10** Mass spectrum of Rho-Gal

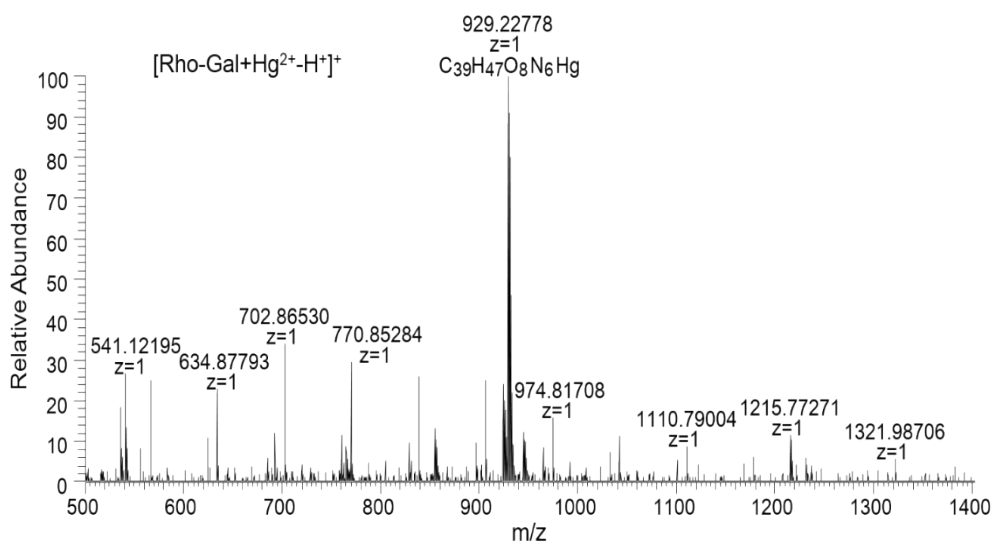

**Fig. S11** Mass spectrum of Rho-Gal-Hg<sup>2+</sup> complex



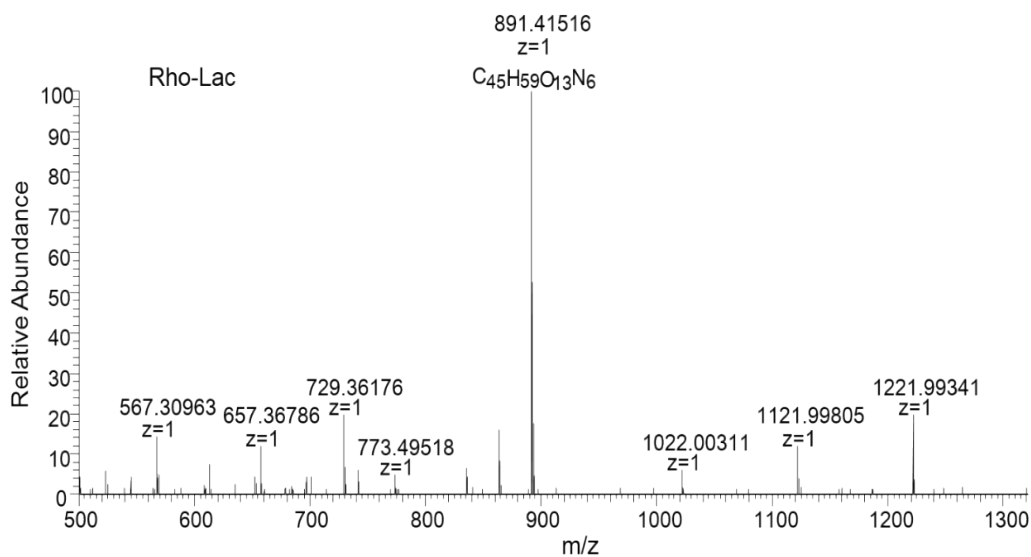

**Fig. S12** Mass spectrum of Rho-Lac

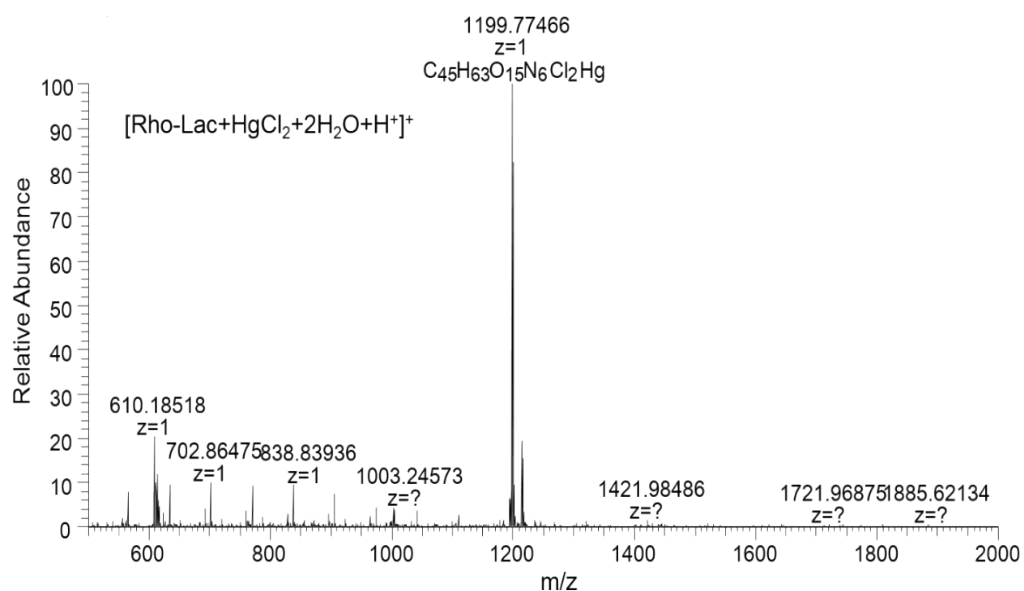

**Fig. S13** Mass spectrum of Rho-Lac-Hg<sup>2+</sup> complex

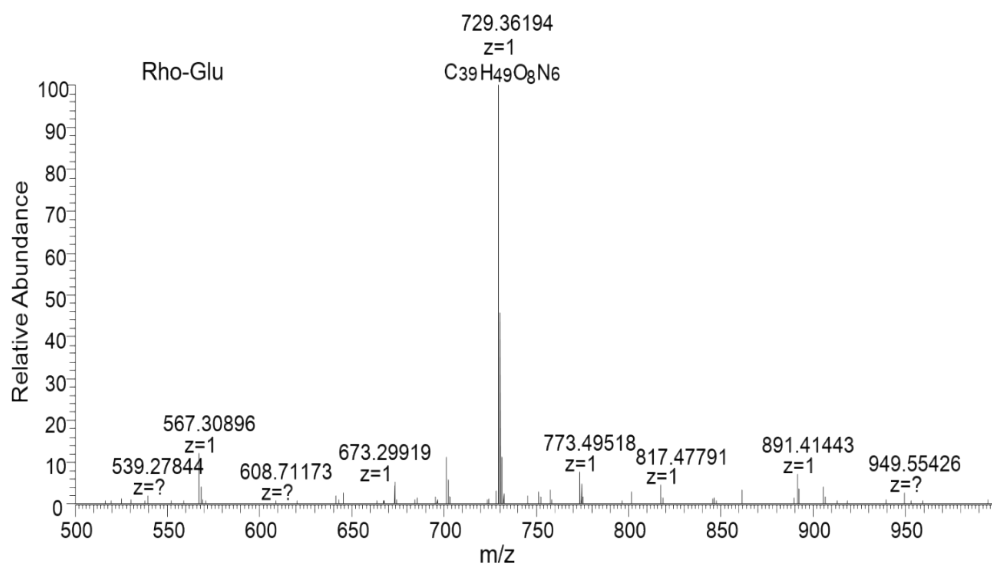

**Fig. S14** Mass spectrum of Rho-Glu

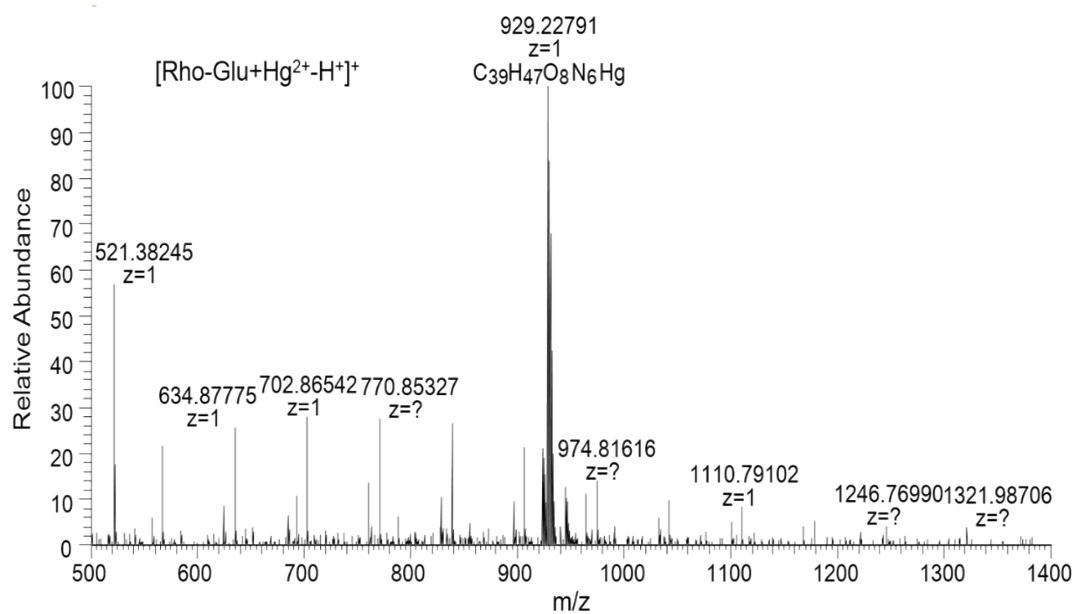

**Fig. S15** Mass spectrum of Rho-Glu-Hg<sup>2+</sup> complex

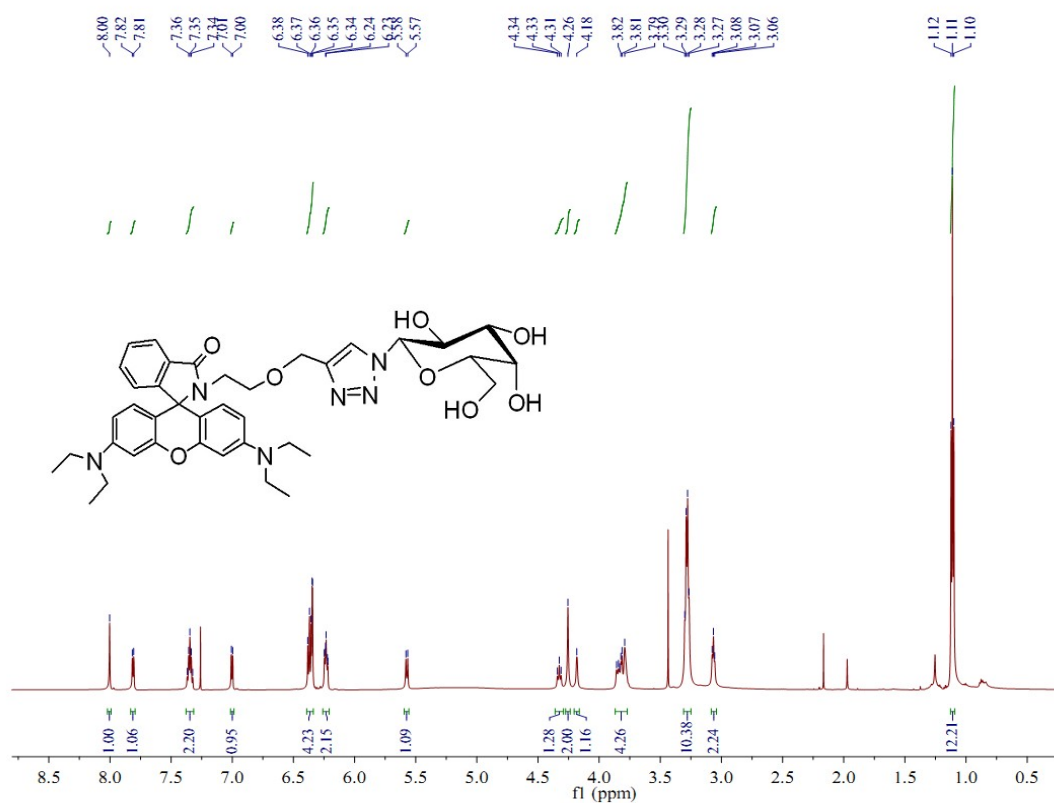

Fig. S16  $^1\text{H}$  NMR of Rho-Gal

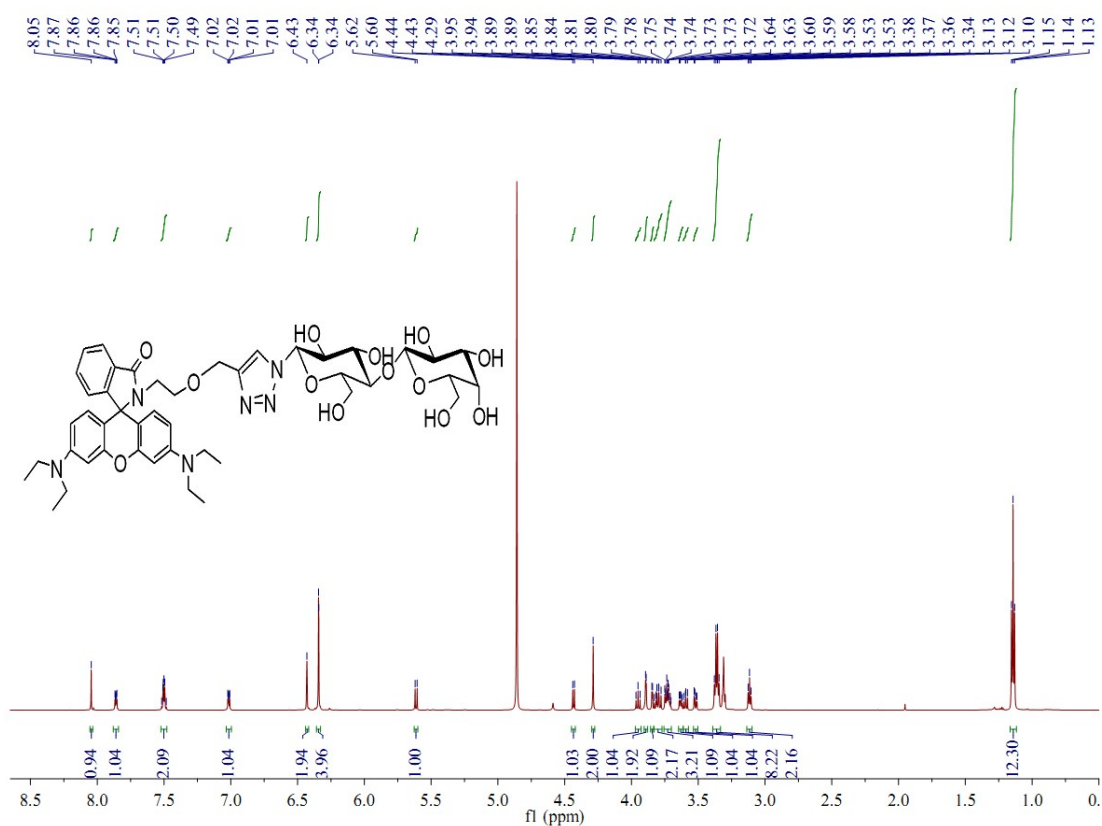

Fig. S17  $^1\text{H}$  NMR of Rho-Lac

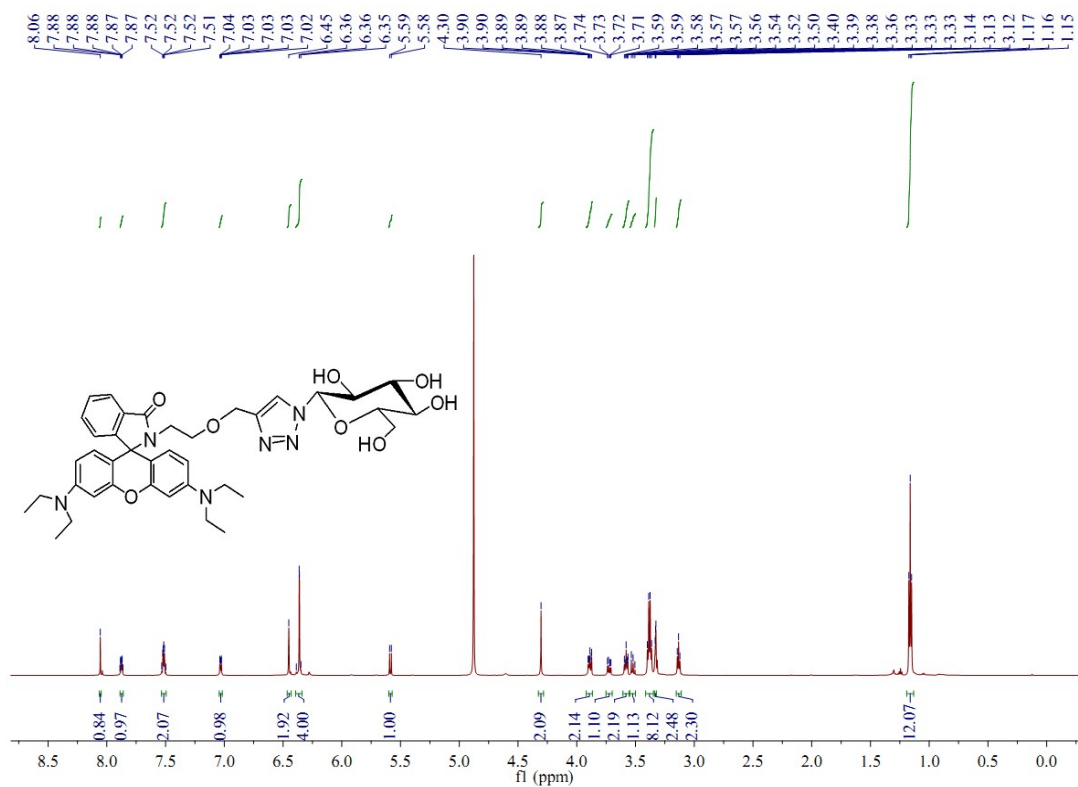

Fig. S18 <sup>1</sup>H NMR of Rho-Glu

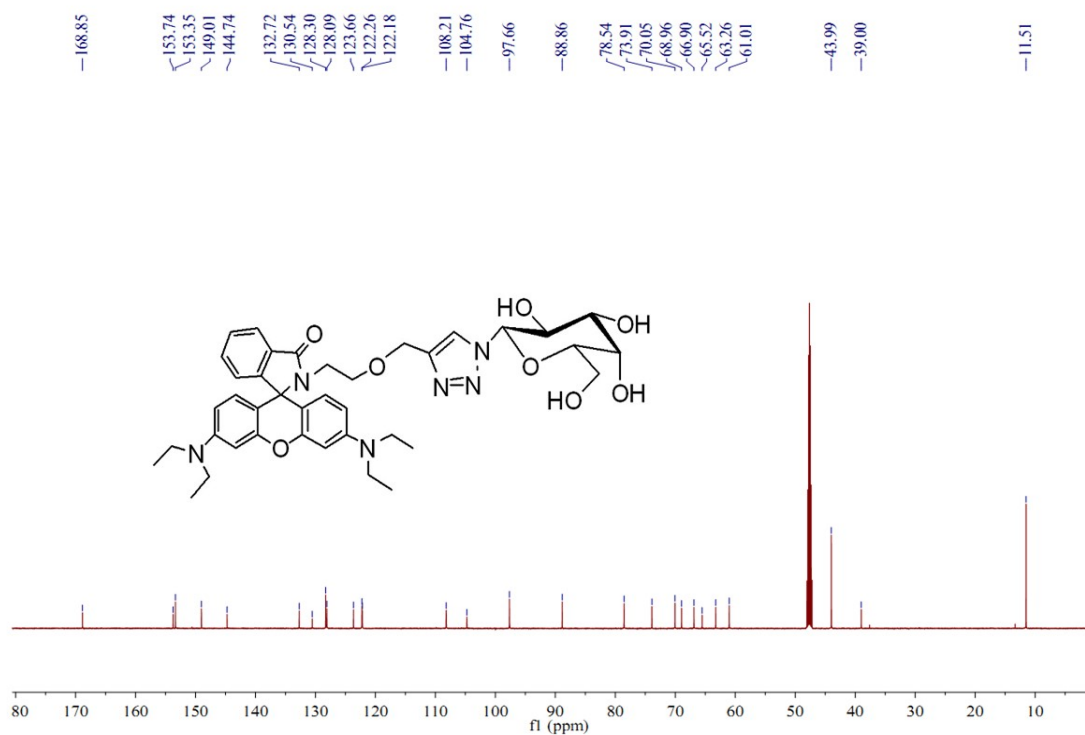

Fig. S19 <sup>13</sup>C NMR of Rho-Gal

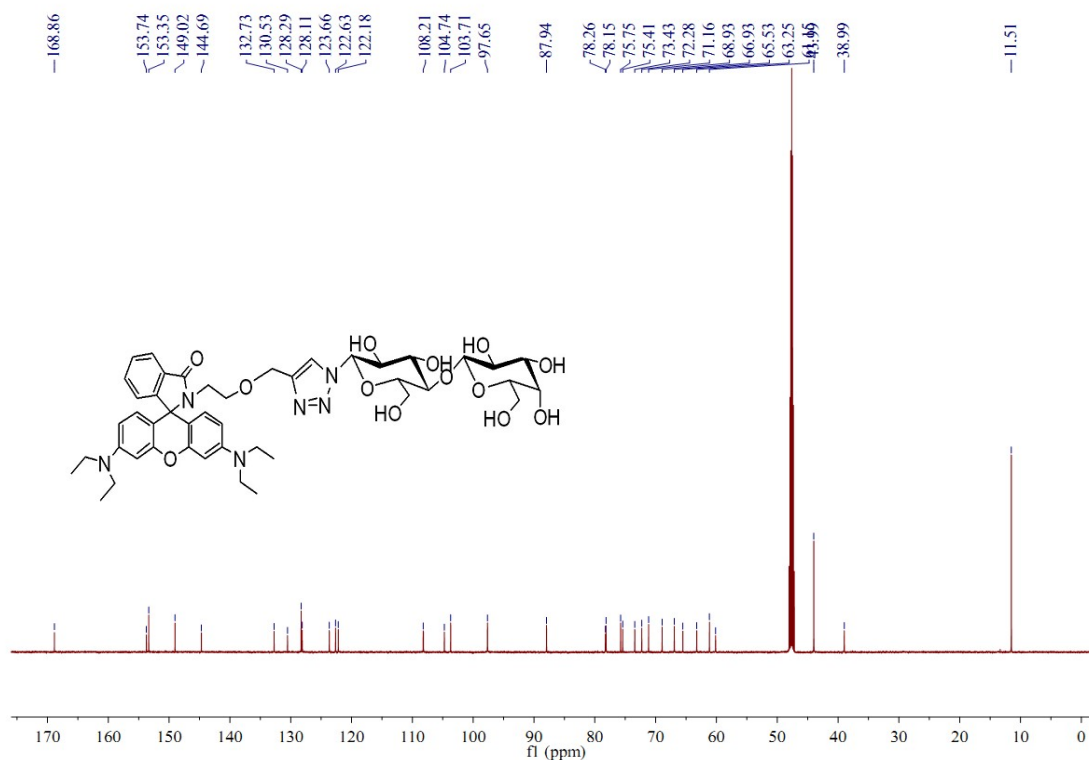

Fig. S20  $^{13}\text{C}$  NMR of Rho-Lac

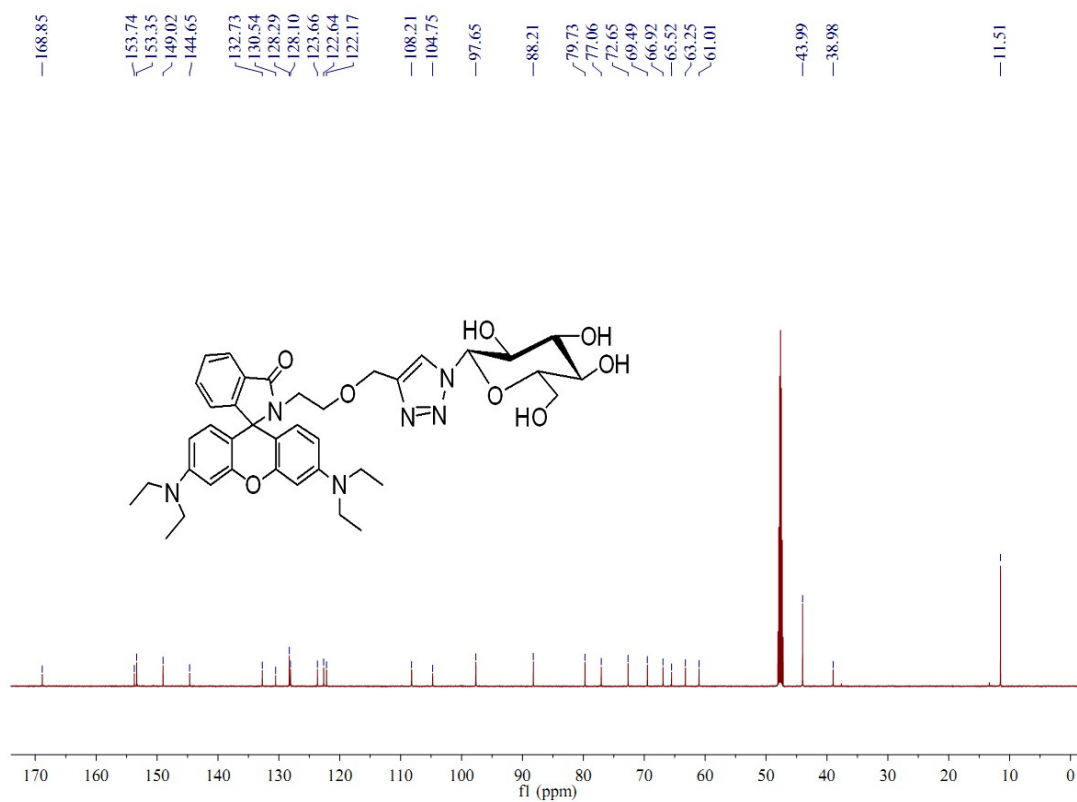

Fig. S21  $^{13}\text{C}$  NMR of Rho-Glu
